# Supplementary material for: Ecological memory of recurrent drought modifies soil processes via changes in soil microbial community
Source: PubMed Central journal article supplement (PMC8421443; doi:10.1038/s41467-021-25675-4), 2021-09-06
Supplement: 41467_2021_25675_MOESM3_ESM.pdf [file 41467_2021_25675_MOESM3_ESM.pdf]

## **Description of Additional Supplementary Files:**

File Name: Supplementary Data 1

Description: The file includes all the data used in the main manuscript except for the amplicon sequencing data and analysis which is deposited in an external repository (see 'Data Availability').
